# Supplementary material for: A ‘chromogenic’ and ‘fluorogenic’ bis-Schiff base sensor for rapid detection of hydrazine both in solution and vapour phases
Source: Royal Society of Chemistry journal article supplement (doi:10.1039/c5ay02617b), 2015-01-01
Supplement: c5ay02617b1.pdf [file c5ay02617b1.pdf]

## **Electronic Supplementary Information**

### **A 'chromogenic' and 'fluorogenic' bis-Schiff base sensor for rapid detection of hydrazine both in solution and vapour phase**

**Anupam Ghorai, Jahangir Mondal, Sumantra Bhattacharya and Goutam Kumar Patra\***

#### **Table of contents.**

1. Synthesis and characterisation of **L**
2. Spectroscopic studies
3. Calculation of detection limit
4. Selectivity study of the probe **L** to hydrazine and other species
5. DFT Study on H-bonding interaction
6. Determination of fluorescence quantum yield

# 1. Synthesis and characterisation of L

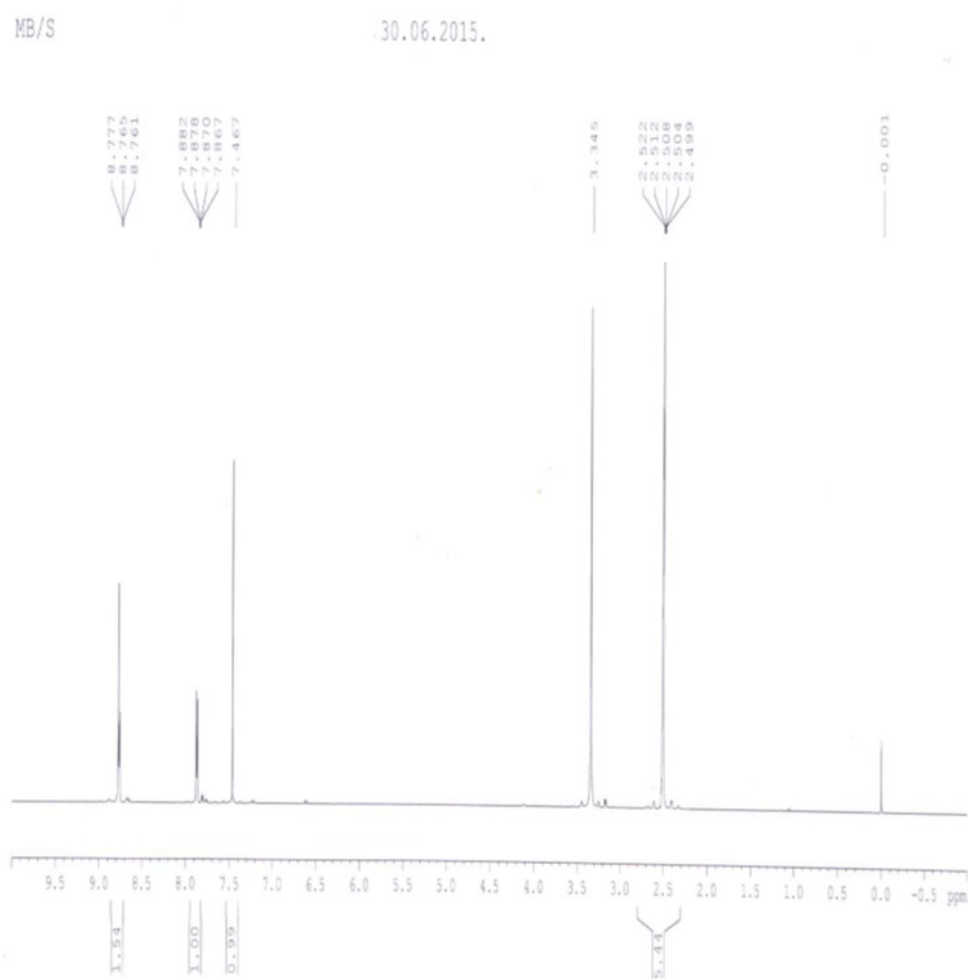

**Fig. S1**  $^1\text{H}$  NMR spectra of L in  $\text{d}_6\text{-DMSO}$ .

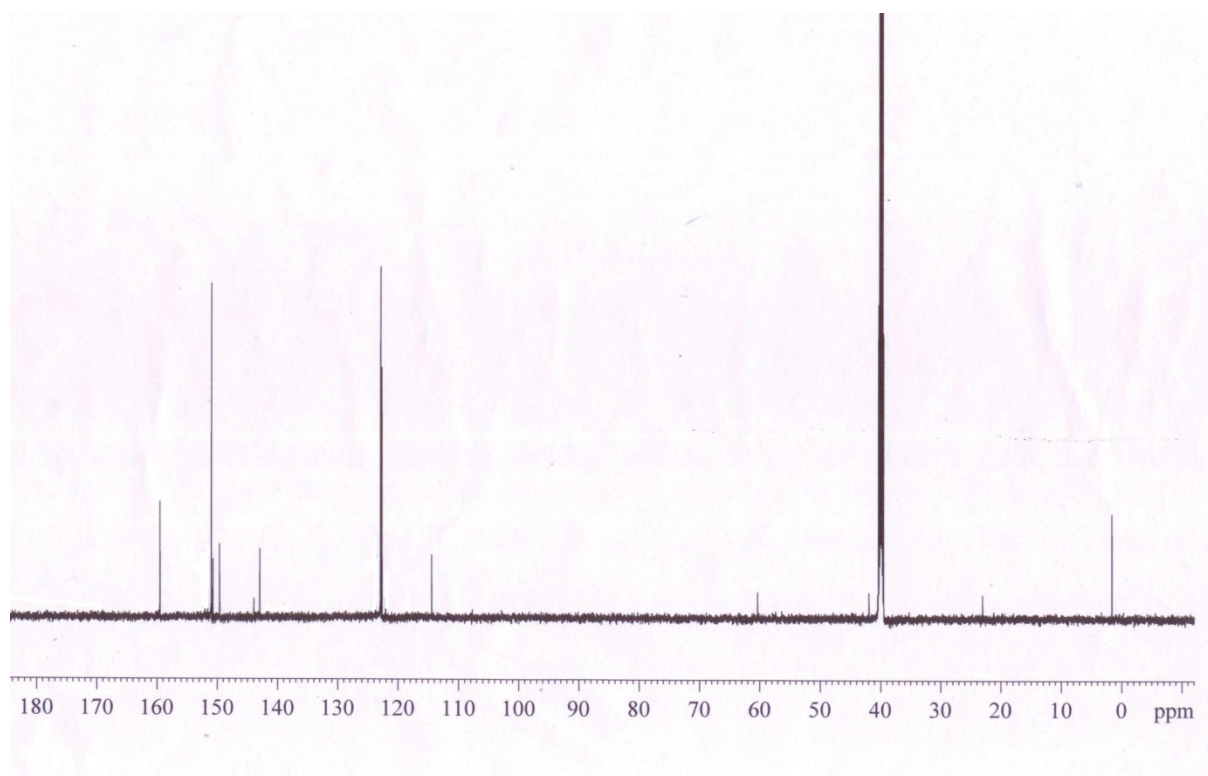

**Fig. S2**  $^{13}\text{C}$  NMR Spectra of **L** in  $\text{d}_6\text{-DMSO}$ .

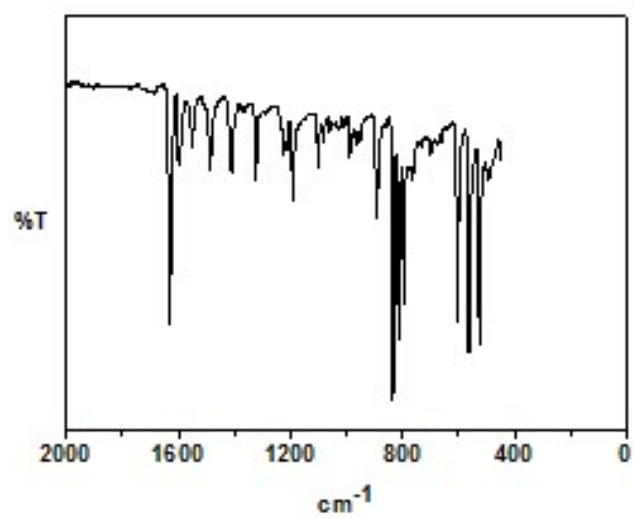

**Fig. S3** IR Spectra of **L**.

Comment 1  
Comment 2

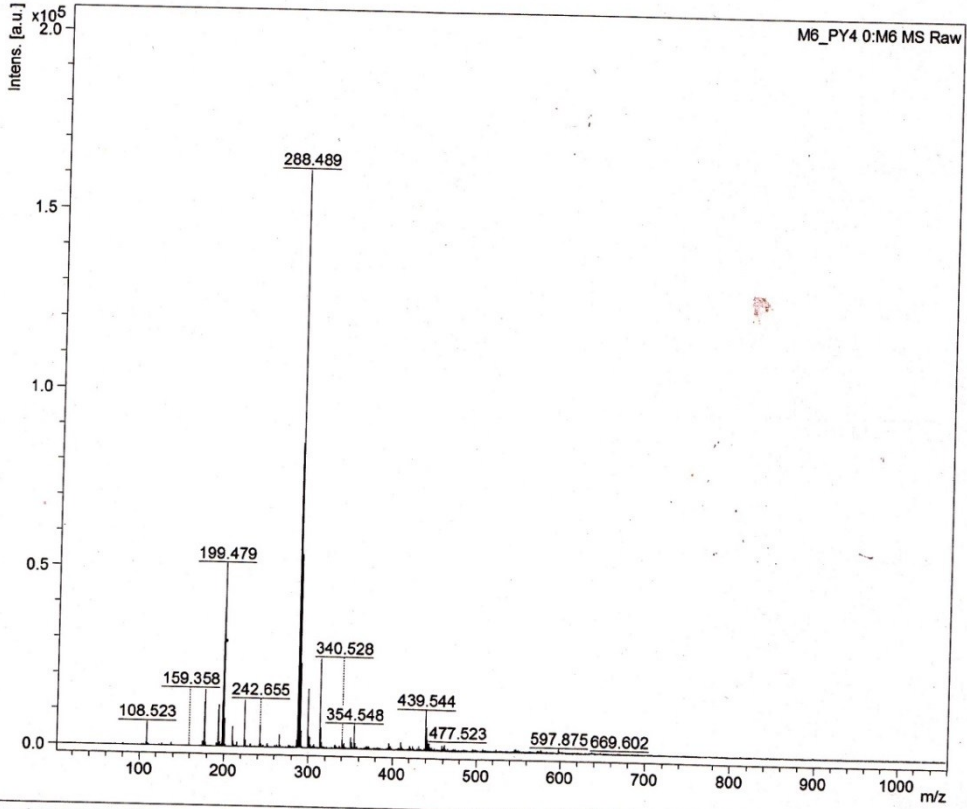

**Acquisition Parameter**

Date of acquisition 2015-01-02T17:36:10.369+05:30  
Acquisition method name D:\User Methods\Low Mass\_RP\_100-1500\_Da.par  
Acquisition operation mode Reflector  
Voltage polarity POS  
Number of shots 1000  
Name of spectrum used for calibration  
Calibration reference list used PeptideCalibStandard mono

**Instrument Info**

Bruker Daltonics flexAnalysis

printed: 1/2/2015 6:01:56 PM

Fig. S4 Mass spectra of L.

## 2. Spectroscopic studies

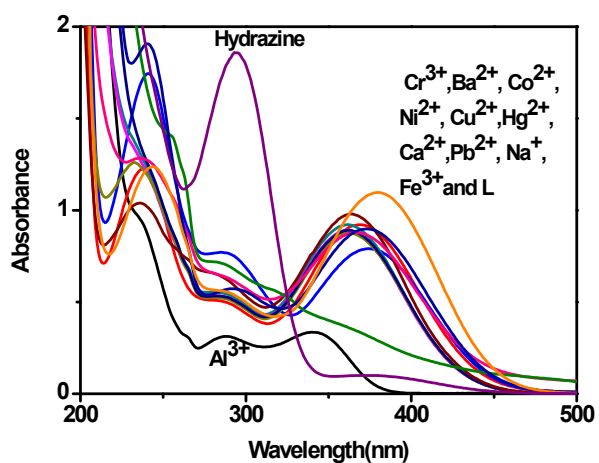

(a)

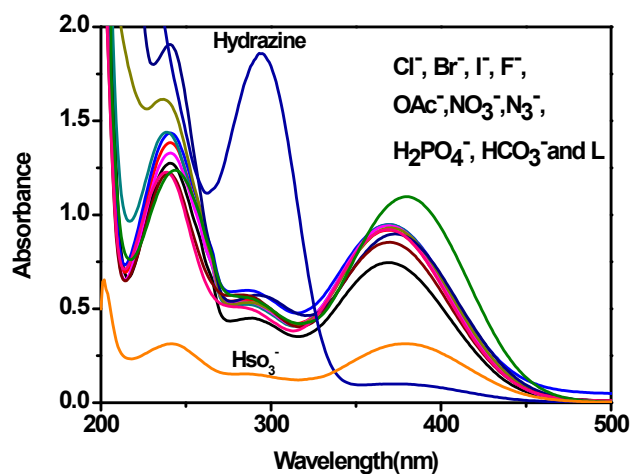

(b)

**Fig. S5** Absorbance spectra of L (10 μM) before and after addition of various (a) cations (2 equiv.) and (b) anions (2 equiv.).

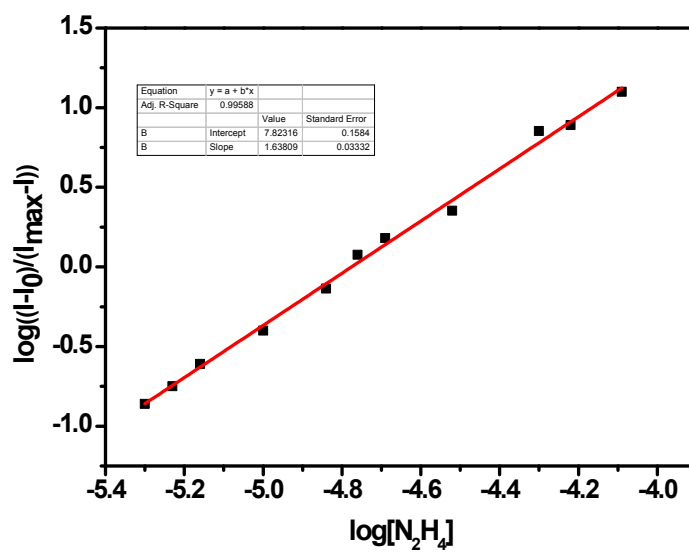

Fig. S6 Hill plot

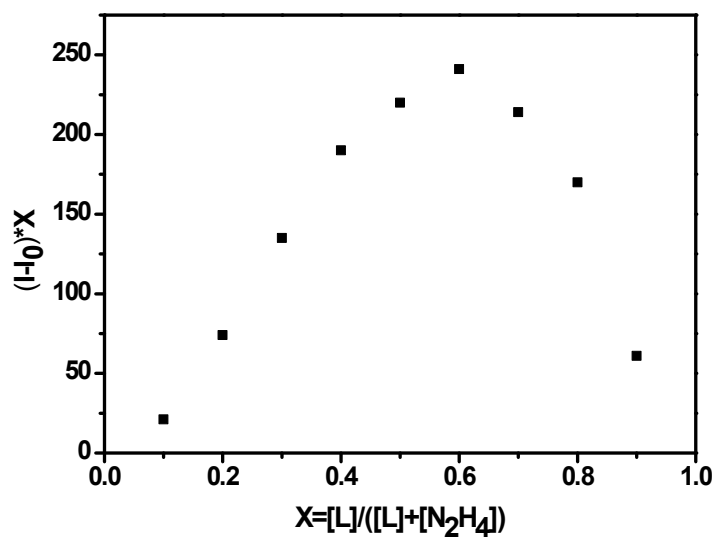

Fig. S7. Job's plot

### 3. Calculation of detection limit

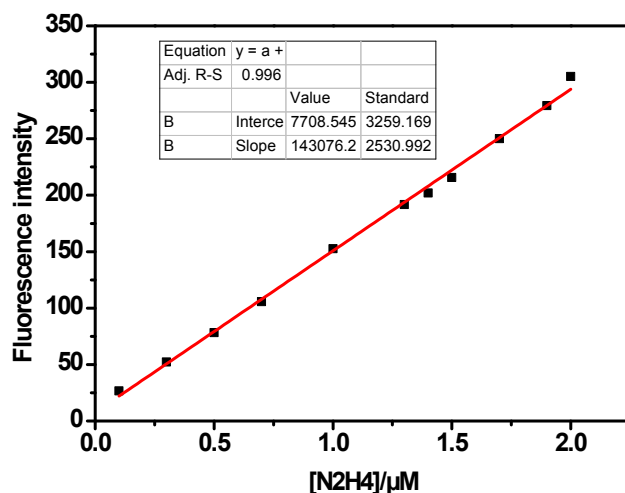

Fig. S8 Detection limit of the probe L for hydrazine.

The detection limit DL of the probe for hydrazine was determined from the following equation:

$$C_{DL} = 3 S_b/m$$

Here  $S_b$  is the standard deviation of the blank solution;  $m$  is the slope of the calibration curve.

From the graph we get slope = 143076.29 and  $S_b$  value is 5225.02

Thus using the formula we get the Detection Limit = 0.1  $\mu\text{M}$  or 3.2 ppb i.e. the probe can detect hydrazine in this minimum concentration.

#### 4. Selectivity study of the probe L to hydrazine and other species

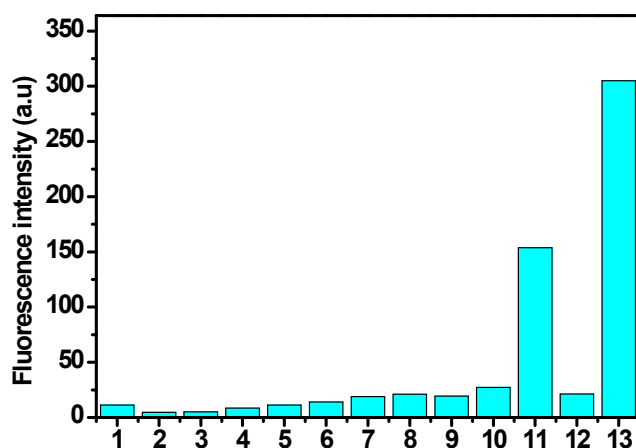

(a)

(a) Fluorescence responses of probe L (10  $\mu\text{M}$ ) to hydrazine and metal ions (1. only L, 2.  $\text{Na}^+$ , 3.  $\text{Ca}^{2+}$ , 4.  $\text{Ba}^{2+}$ , 5.  $\text{Cr}^{3+}$ , 6.  $\text{Co}^{2+}$ , 7.  $\text{Cu}^{2+}$ , 8.  $\text{Pb}^{2+}$ , 9.  $\text{Hg}^{2+}$ , 10.  $\text{Cd}^{2+}$ , 11.  $\text{Ni}^{2+}$ , 12.  $\text{Fe}^{3+}$  and 13. Hydrazine). Each spectrum was recorded after 2 minute.

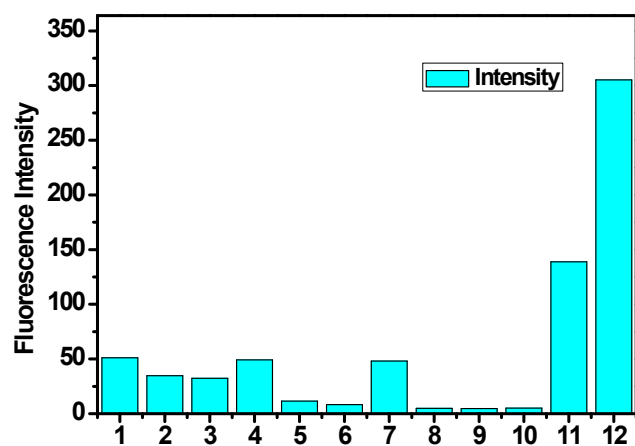

(b)

(b) Fluorescence responses of probe **L** (10  $\mu\text{M}$ ) to hydrazine and other anions (1.  $\text{H}_2\text{PO}_4^-$ , 2.  $\text{Cl}^-$ , 3.  $\text{Br}^-$ , 4.  $\text{HCO}_3^-$ , 5.  $\text{I}^-$ , 6.  $\text{F}^-$ , 7.  $\text{OAc}^-$ , 8.  $\text{NO}_3^-$ , 9.  $\text{N}_3^-$ , 10. only **L** and 11. hydrazine). Each spectrum was recorded after 2 minute.

**Fig. S9** Selectivity studies of **L** (10  $\mu\text{M}$ ) with various (a) cations (2 equiv.) (b) anions (2 equiv.)

### 5. DFT Study on H-bonding interaction

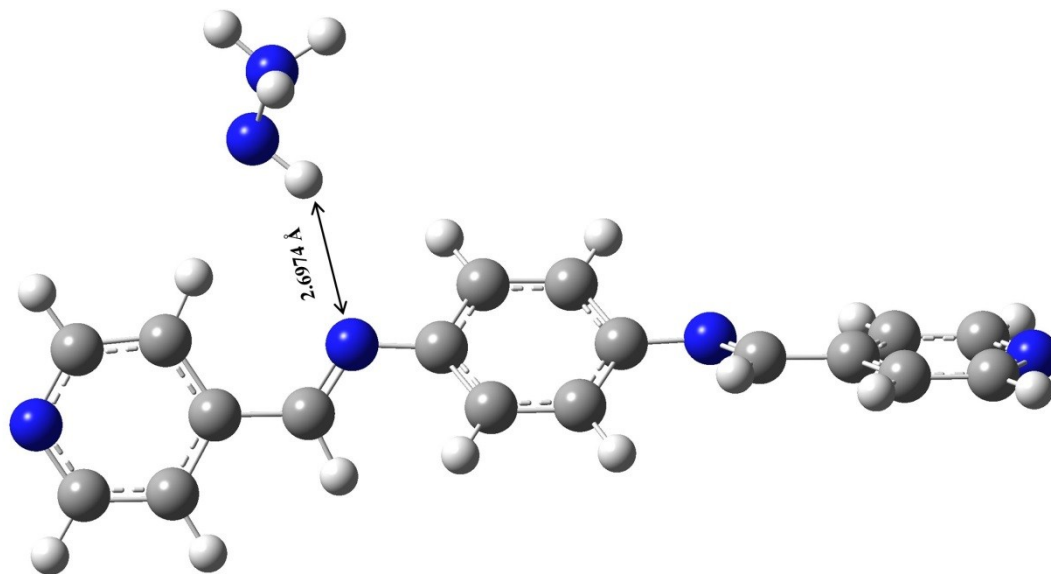



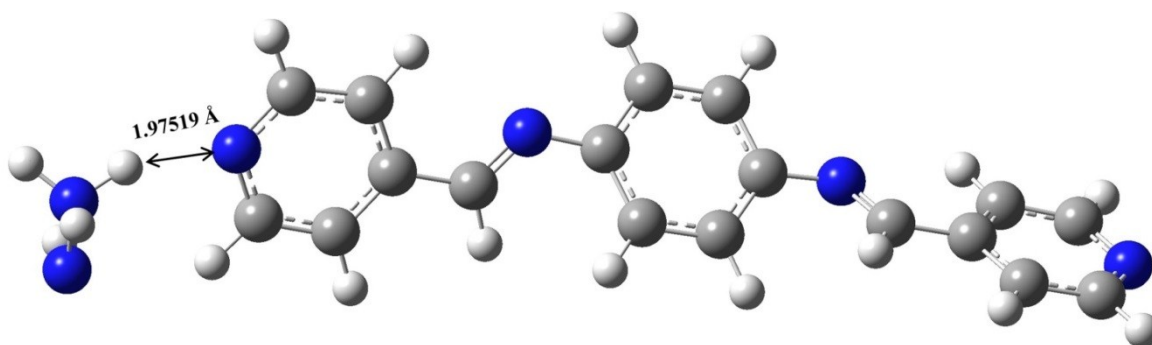

**Fig. S10** The optimized structures of hydrazine and the ligand. (a) When  $^{-}\text{NH-NH}_3^{+}$  interacts with the N atom of chain, (b)  $^{-}\text{NH-NH}_3^{+}$  interacts with terminal N. The value is the distance of the optimum structure.

**Table S1** Excitation of ligand

| Most important orbital excitation                     | $\lambda$ [nm] | $f$    | Experimental $\lambda$ [nm] ( $\epsilon$ ) |
|-------------------------------------------------------|----------------|--------|--------------------------------------------|
| H->L                                                  | 406.11         | 0.9736 | 370                                        |
| H-7->L, H-6->L+1, H->L+1                              | 353.09         | 0.0031 |                                            |
| H-1->L, H->L+1, H->L+4                                | 308.95         | 0.0020 |                                            |
| H-5->L+1, H-4->L                                      | 301.50         | 0.0023 |                                            |
| H-9->L, H-8->L+1, H-7->L+1, H-3->L,<br>H-1->L+1, H->L | 292.26         | 0.4117 | 287                                        |
| H-3->L+1, H-2->L, H->L+3                              | 283.34         | 0.0357 |                                            |
| H-6->L, H-3->L, H-2->L+1, H->L+2                      | 282.99         | 0.0565 |                                            |
| H-6->L, H-1->L+1                                      | 269.69         | 0.0306 |                                            |
| H-7->L, H-1->L, H-1->L+5, H->L+4                      | 252.84         | 0.0835 |                                            |
| H-9->L, H-8->L, H-7->L+1, H-3->L+1,<br>H->L+3         | 240.69         | 0.3710 | 239                                        |
| H-9->L, H-8->L+1, H-7->L+1, H-1->L+4,<br>H->L+5       | 230.72         | 0.0676 |                                            |

**Table S2** Excitation of ligand-hydrazine mixture (Terminal)

| Most important orbital excitation                                                              | $\lambda$ [nm] | $f$    |
|------------------------------------------------------------------------------------------------|----------------|--------|
| H->L                                                                                           | 406.47         | 1.0019 |
| H-11->L, H-10->L+1, H-9->L, H-9->L+1, H-8->L, H-8->L+1, H-7->L, H-6->L, H-5->L, H-4->L+1, H->L | 290.98         | 0.4103 |
| H-11->L, H-10->L+1, H-9->L+1, H-8->L+1, H-7->L+1, H->L+5                                       | 240.83         | 0.3661 |

**Table S3** Excitation of ligand-hydrazine mixture (chain)

| Most important orbital excitation                                                | $\lambda$ [nm] | $f$    |
|----------------------------------------------------------------------------------|----------------|--------|
| H->L                                                                             | 403.01         | 0.9498 |
| H-10->L, H-10->L+1, H-9->L, H-8->L, H-8->L+1, H-5->L, H-3->L+1, H-1->L+1, H->L+1 | 291.32         | 0.2094 |
| H-11->L, H-10->L+1, H-9->L+1, H-8->L+1, H->L+5                                   | 240.21         | 0.3761 |

**Table S4** Mulliken Charge analysis

| System                                   | Mulliken charge on ligand |
|------------------------------------------|---------------------------|
| GP_GO6-31GPP3D2PB3LYP_hydrazine_chain    | -0.012366                 |
| GP_GO6-31GPP3D2PB3LYP_hydrazine_terminal | 0.010054                  |
| GP_GO6-31GPP3D2PB3LYP_NH-NH3_chain       | -0.026694                 |
| GP_GO6-31GPP3D2PB3LYP_NH-NH3_terminal    | 0.009230                  |

## 6. Determination of fluorescence quantum yield.

The fluorescence quantum yield was obtained by comparing the integrated area of the corrected emission spectrum of the samples with the reference under the same excited wavelength. The concentration of the reference L-tryptophane ( $\Phi=0.14$ )<sup>1</sup> in aqueous solution was adjusted to match the absorbance of the test sample. The quantum yield of L-N<sub>2</sub>H<sub>4</sub> was tested by using a colourless solution containing of 1  $\mu$ M probe **L** and 10  $\mu$ M hydrazine.

Emission for probe **L** and **L-N<sub>2</sub>H<sub>4</sub>** was integrated from 350 to 550 nm with excitation at 310 nm. The quantum yields were calculated with the following equation<sup>2</sup>.

$$\Phi_{sample} = \Phi_{reference} \times \frac{\int emission_{sample}}{\int emission_{reference}} \times \frac{A_{reference}}{A_{sample}}$$

Reference:

1. Y. P. Zhang, Y.J. Wei, N. Li and S. J. Qiu, *Chinese Journal of Analytical Chemistry*, 2004, **32**, 779.
2. C. A. Parker and W. T. Rees, *The Analyst*, 1960, **85**, 587.
